# Supplementary material for: Aberrant androgen action in prostatic progenitor cells induces oncogenesis and tumor development through IGF1 and Wnt axes
Source: PubMed Central journal article supplement (PMC9334353; doi:10.1038/s41467-022-32119-0), 2022-07-28
Supplement: 41467_2022_32119_MOESM3_ESM.pdf [file 41467_2022_32119_MOESM3_ESM.pdf]

## **Description of Additional Supplementary Files**

File Name: Supplementary Data 1

Description: The list of differentially expressed genes between *hArtg* positive and negative basal epithelial cells, related to Figure 3

File Name: Supplementary Data 2

Description: Differential binding regions from CHIP-seq data, related to Figure 3

File Name: Supplementary Data 3

Description: The list of differentially expressed genes between tumor and normal luminal epithelial cells, related to Figure 4

File Name: Supplementary Data 4

Description: The list of differentially expressed genes between PIN and WT, related to Figure 5

File Name: Supplementary Data 5

Description: The list of differentially expressed genes between PCa and WT, related to Figure 5

File Name: Supplementary Data 6

Description: The list of differentially expressed genes between PCa and PIN, related to Figure 5
